1  
2  
3  
4  
5  
6  
7  
8  
9  
10  
11  
12  
13  
14  
15  
16  
17  
18  
19  
20  
21  
22  
23

**Coding of social novelty in the hippocampal CA2 region  
and its disruption and rescue in a mouse model of schizophrenia**

Macayla L. Donegan<sup>1</sup>, Fabio Stefanini<sup>1</sup>, Torcato Meira<sup>1,2,3</sup>,  
Joshua A. Gordon<sup>4</sup>, Stefano Fusi<sup>1</sup>, and Steven A. Siegelbaum<sup>1</sup>

<sup>1</sup>Department of Neuroscience, Zuckerman and Kavli Institutes, Vagelos College of Physicians and Surgeons, Columbia University, New York, NY 10027 USA,

<sup>2</sup>Life and Health Sciences Research Institute (ICVS), School of Medicine, University of Minho, Braga 4710-057, Portugal.

<sup>3</sup>ICVS/3B's - PTGovernment Associate Laboratory, Braga/Guimarães 4806-909, Portugal.

<sup>4</sup>National Institute of Mental Health, NIH, Bethesda, MD, 20852 USA

Corresponding Author: Steven A. Siegelbaum, [sas8@cumc.columbia.edu](mailto:sas8@cumc.columbia.edu)

24 **Abstract**

25

26 The hippocampal CA2 region is essential for social memory and has been implicated in  
27 neuropsychiatric disorders. However, little is known about how CA2 neural activity encodes social  
28 interactions and how this coding is altered in disease. We recorded from CA2 pyramidal neurons  
29 as mice engaged in social interactions and found that while CA2 failed to stably represent spatial  
30 location, CA2 activity encoded contextual changes and novel social stimuli. In the *Df(16)A<sup>+/-</sup>*  
31 mouse model of the human 22q11.2 microdeletion, a major schizophrenia risk factor, CA2 activity  
32 showed a surprising increase in spatial coding while failing to encode social novelty, consistent  
33 with the social memory deficit in these mice. Previous work has shown that CA2 pyramidal  
34 neurons are hyperpolarized in *Df(16)A<sup>+/-</sup>* mice, likely as a result of upregulation of TREK-1 K<sup>+</sup>  
35 current. We found that administration of a TREK-1 antagonist rescued the social memory deficits  
36 and restored normal CA2 coding properties in *Df(16)A<sup>+/-</sup>* mice, supporting a crucial role for CA2 in  
37 the encoding of novel social stimuli and social dysfunction.

38

39

## 40 **Introduction**

41 Social memory, the ability of an animal to recognize and remember a previously  
42 encountered conspecific, is indispensable for a wide range of social behaviors<sup>1</sup>. Deficits in social  
43 memory and social behavioral changes are commonly associated with neuropsychiatric disease<sup>2</sup>.  
44 Lesion studies in both humans<sup>3</sup> and rodents<sup>4</sup> indicate that the hippocampus, a brain region well-  
45 known to be important for several forms of declarative memory<sup>5</sup>, is also necessary for encoding  
46 social memory. Although the ability of hippocampal neural firing to represent spatial, contextual  
47 and semantic information that may contribute to memory encoding has been well established<sup>6-9</sup>,  
48 how hippocampus encodes and represents social information in behaviorally relevant contexts is  
49 less well understood.

50 Recent studies indicate that the long overlooked hippocampal CA2 subregion is a critical  
51 component of the circuit necessary for encoding social information into declarative memory. Both  
52 short and long-term silencing of dorsal CA2 prevents social memory formation, consolidation and  
53 recall<sup>10-12</sup>. Although dorsal CA2 provides strong input to dorsal CA1, recently our laboratory found  
54 that social memory depends on the CA2 projections to ventral CA1<sup>10</sup>, an area that is also required  
55 for social memory and that can encode social engrams<sup>13,14</sup>. However, at present, it is unclear as  
56 to whether and how dorsal CA2 itself encodes social information that could be relevant for social  
57 memory.

58 Previous studies have found that CA2 spatial firing properties clearly differ from those of  
59 neighboring dorsal CA1 and CA3 regions. Thus, CA2 place fields have lower spatial information  
60 than those in CA1 or CA3<sup>15-18</sup>. CA2 place fields are spatially unstable in the same environment  
61 over time<sup>15</sup>, showing clear differences with the more stable and spatially precise CA1 place cell  
62 firing. CA2 activity is also more sensitive to contextual change than CA1 and CA3<sup>19</sup>. Of interest,  
63 CA2 place fields globally remap in the presence of novel objects or of familiar or novel social  
64 stimuli<sup>16</sup>, although whether CA2 firing contains specific social information that is relevant to social  
65 memory remains unknown.

66           The role of CA2 in social memory is of particular clinical relevance as postmortem  
67 hippocampal tissue from individuals with schizophrenia or bipolar disorder reveal a 30% decrease  
68 in the number of parvalbumin positive interneurons selectively in CA2, with no changes in other  
69 hippocampal regions<sup>20,21</sup>. A similar CA2-selective loss of PV+ interneurons is observed in the  
70 *Df(16)A*<sup>+/-</sup> mouse model of the human 22q11.2 microdeletion<sup>22</sup>, which confers a 30-fold increase  
71 in the risk of developing schizophrenia<sup>23</sup>. Although the decrease in inhibition might be expected  
72 to enhance CA2 pyramidal neuron (PN) activity and thus enhance social memory, these mice  
73 actually have a profound deficit in social memory<sup>22</sup>. This behavioral deficit may reflect the fact  
74 that, in addition to the decreased inhibition, CA2 PNs become hyperpolarized in these mice, likely  
75 as a result of the upregulation of the TREK-1 two-pore K<sup>+</sup> channel, which is normally highly  
76 enriched in CA2<sup>22</sup>. It remains an open question as to whether and how the opposing actions of  
77 decreased CA2 inhibition and hyperpolarization of CA2 principal cells affect their *in vivo* firing  
78 properties. Additionally, the role of TREK-1 upregulation in the social memory deficits seen in the  
79 *Df(16)A*<sup>+/-</sup> mice has not been explored at either the behavioral or electrophysiological level.

80           Here we examined CA2 firing properties using extracellular recordings from dorsal CA2  
81 pyramidal neurons in freely behaving animals during spatial exploration and social interactions.  
82 We found that CA2 neurons failed to encode location but reliably reported social novelty at both  
83 the single cell and population level in wild-type mice. Moreover, social novelty coding was  
84 impaired in the *Df(16)A*<sup>+/-</sup> mice, providing a potential explanation for their social memory deficit<sup>22</sup>.  
85 Surprisingly, CA2 neurons in the *Df(16)A*<sup>+/-</sup> mice showed enhanced spatial coding properties,  
86 suggesting that neuropsychiatric disease can transform the major cognitive function of a given  
87 brain region. Finally, we found that suppression of TREK-1 in the disease model mice rescued  
88 both normal social memory behavior and the normal social and spatial coding preferences of CA2  
89 neurons, suggesting that CA2 neurons may provide a novel drug target for treating the negative  
90 social symptoms of schizophrenia.

91



## 92 **Results**

### 93 **CA2 spatial firing was unstable during a three-chamber social interaction task**

94 We characterized CA2 firing as mice investigated various social and non-social stimuli by  
95 performing extracellular electrophysiological recordings from dorsal CA2 and CA1 pyramidal  
96 neurons during a three-chamber social interaction task (Figure 1a). In the task a mouse was  
97 exposed to a three-chamber arena in five sequential 10 minute sessions in which: 1) the chambers  
98 were void of all objects (empty chamber session); 2) the chambers contained two identical wire  
99 cup cages as novel objects in the two end chambers (objects session); 3) two familiar littermates  
100 (L1 and L2) were placed one each in the wire cup cages (familiar social session 1); 4) one  
101 littermate was replaced with a novel mouse (novel social session); and 5) the novel mouse was  
102 replaced by the original littermate (familiar social session 2).

103 We found that CA2 neurons showed only weak spatially selective firing as an animal  
104 explored the three chambers in the five sessions (Figure 1b,c), consistent with previous reports  
105 under different behavioral conditions<sup>15,16,24</sup>. CA2 place fields were large and diffuse, with a typical  
106 neuron exhibiting multiple firing fields that were less spatially selective than CA1 fields in the same  
107 environment (Figure 1b-d). Analysis of mean data from 192 CA2 neurons from 6 animals and 87  
108 CA1 neurons from 3 animals revealed that CA2 PNs have more place fields per cell (CA2 =  $2.61$   
109  $\pm 0.12$  fields; CA1 =  $2.0 \pm 0.15$  fields;  $p=0.02$ , paired t-test), larger place fields (CA2= $107.3 \pm 10.1$   
110 pixels; CA1= $62.94 \pm 5.96$  pixels;  $p=0.04$ , paired t-test), and lower spatial information scores than  
111 CA1 (CA2 =  $0.42 \pm 0.02$  bits/spike; CA1 =  $0.60 \pm 0.09$  bits/spike;  $p < 0.001$ , paired t-test). This is  
112 in agreement with previous studies comparing CA2 firing properties to those of CA1 in an open  
113 field<sup>15,24</sup>. The number and size of CA2 place fields, along with the amount of spatial information,  
114 did not vary from session to session in the three-chamber task (Supplemental Figure 1).

115 In addition to the decreased spatial information compared to CA1, CA2 place fields were  
116 less spatially stable across the different sessions of the three-chamber task in comparison to CA1.  
117 This was evident in both individual cell firing plots (Figure 1b-d), and in measurements of

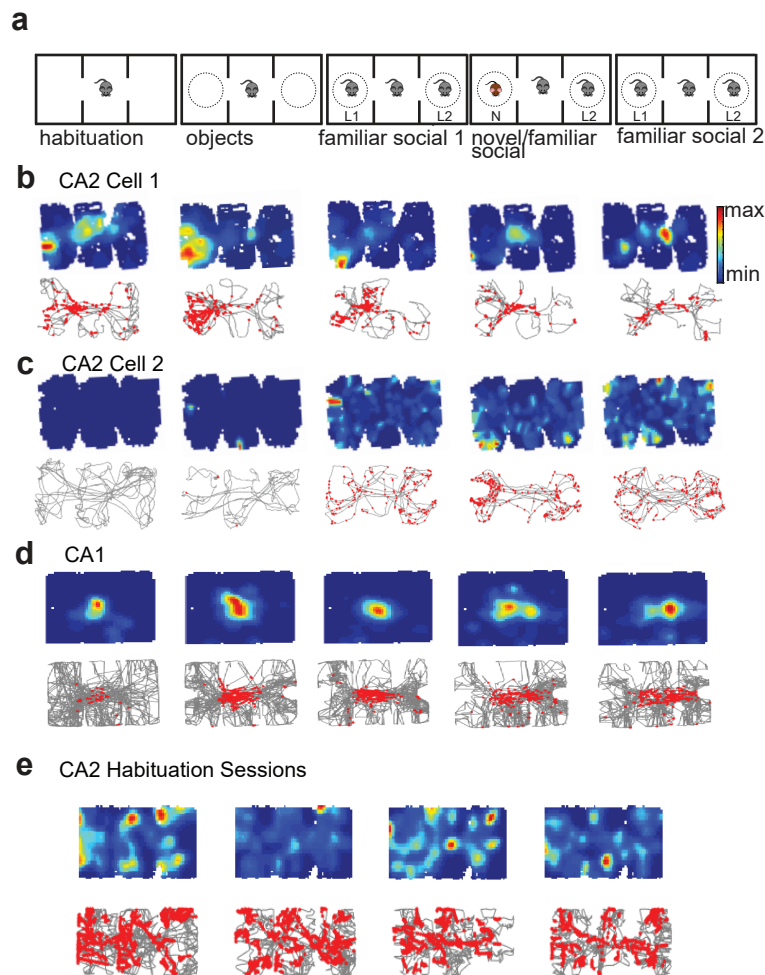

**Figure 1. Hippocampal firing in the three-chamber interaction task.** (a) The three-chamber interaction task. Mice explored in five sequential 10-min sessions the three chamber environment: 1) empty arena (empty session), 2) two identical novel objects (empty wire cup cage) placed in the two side chambers (objects session), 3) two familiar littermates (L1 and L2) placed one in each cup (familiar social session 1; fam1), 4) a novel mouse (N) present in one cup and the remaining littermate present in the other cup (novel session), 5) return to the two original familiar mice (familiar session 2; fam2). (b) Example CA2 neuron place cell heat maps (top). Bottom, single spikes (red dots) on top of trajectory trace (gray). Maximum firing rates in sessions 1-5 were: 7 Hz, 7 Hz, 9 Hz, 9 Hz, 5 Hz, respectively. (c) Example CA2 neuron that was nearly silent in non-social sessions 1 and 2 and that became active in social sessions 3-5. Maximum firing rates in sessions 1-5 were: 1 Hz, 2 Hz, 15 Hz, 22 Hz, 10 Hz. (d) Example CA1 cell showing stable place fields throughout all sessions. Maximum firing rates in sessions 1-5 were: 1 Hz, 5 Hz, 7 Hz, 4 Hz, 4 Hz. (e) Example firing of a CA2 cell during four 10-min successive sessions of a 40 min habituation period to the empty chambers. Maximum firing rates in sessions 1-4 were: 19 Hz, 34 Hz, 13 Hz, 19 Hz.

118 Pearson's correlation values ( $r$ ) of place fields between different sessions (Figure 2a, c). Of  
119 interest, CA2 spatial firing was significantly more stable during four identical 10-min sessions  
120 throughout a 40-minute-long habituation period to the empty three-chamber environment carried  
121 out on the day prior to the three-chamber task (Figures 1e and 2b,c), suggesting that the spatial  
122 instability across the different sessions of the three-chamber task is related to alterations in the  
123 content of the chambers (Figures 1f,2b).

124 It has been suggested that CA2 spatial firing becomes more stable after the addition of a  
125 social stimulus<sup>16</sup>, which would imply that spatial firing patterns would be more similar between  
126 sessions with the same social stimuli. However, we found that the spatial correlation between  
127 the two familiar mice sessions (sessions 3 versus 5;  $r = 0.21 \pm 0.22$ ), which contained the same  
128 social stimuli at the same locations, was no greater than the spatial correlations between the  
129 object and familiar social sessions (sessions 2 versus 3/5;  $r = 0.23 \pm 0.24$ ), or the novel and  
130 familiar social sessions (sessions 3 versus 4;  $r = 0.25 \pm 0.27$ ;  $p > 0.05$  in all comparisons, paired  $t$ -  
131 tests). These results indicate that the stability of spatial information that CA2 encodes was not  
132 enhanced by contextual information (Figure 2a,c).

133

### 134 **CA2 population activity encoded contextual but not spatial information in the three-** 135 **chamber task**

136 Several studies have shown that populations of neurons may accurately encode aspects  
137 of an environment even if individual neuron firing properties do not. Thus, place fields in dentate  
138 gyrus<sup>25</sup> and ventral CA1<sup>26</sup>, which have lower spatial information content compared to dorsal CA1  
139 neurons, can nonetheless encode position at the population level as accurately as dorsal CA1.  
140 To examine whether this was the case for dorsal CA2 pyramidal neurons, we used a machine  
141 learning approach. A set of support vector machines (SVM)<sup>27-29</sup> using a linear kernel were trained  
142 to decode the position of an animal as it explored the three chambers based on CA1 or CA2  
143 population activity. Whereas the decoder based on CA1 activity accurately predicted an animal's

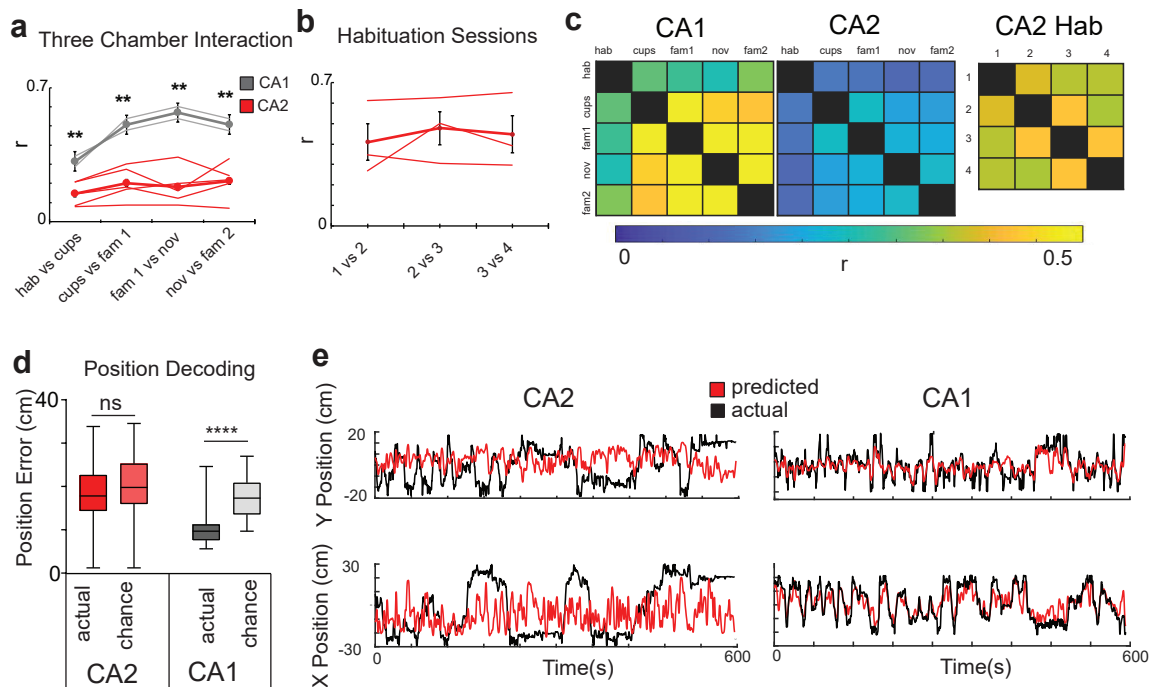

**Figure 2. CA2 spatial firing is unstable and fails to decode position.** (a) Plot of Pearson's correlation ( $r$ ) between place field maps in successive pairs of the five three-chamber task sessions for CA2 and CA1 neurons. Thin traces show results from individual animals and thick traces show means ( $n=192$  CA2 neurons from 6 animals;  $n=87$  CA1 neurons from 3 animals). Error bars show SEM. CA2 firing was less stable than CA1 firing (paired t-tests with Bonferroni correction for multiple comparisons;  $p = 0.02, 0.006, 0.003, 0.009$ ). (b) CA2 place field correlations between pairs of the four 10-min habituation sessions. (c) Left, Color-coded plots of mean spatial correlations between each pair of sessions averaged over all CA2 and CA1 neurons in three-chamber task. Right, CA2 neuron correlations for pairs of sessions during the 40-min habituation period. (d) Mean error of position with support vector machine (SVM) decoding based on CA2 and CA1 population spatial firing data in three-chamber task compared to chance performance. CA1 decoding performed above chance ( $p < .0001$ , Wilcoxon rank-sum test;  $n=87$  neurons from 3 animals) whereas CA2 did not ( $p > 0.05$ ;  $n=192$  neurons from 6 animals). (e) Example of SVM position decoding with a linear kernel from CA2 and CA1 neuron firing from individual mice. Actual X-Y position trajectory (black traces) and predicted location (red traces) decoded from CA2 and CA1 firing (smoothed for visualization). Location plotted relative to center of the three-chamber environment.

144 location in all sessions of the three-chamber task, the decoder based on CA2 activity failed to  
145 predict spatial location above chance levels during any of the sessions (Figure 2c; Supplemental  
146 Figure 2). CA2 also failed to decode position in any of the four 10-min sessions of the 40 min  
147 period of habituation to the empty chambers, indicating that CA2 also provided weak spatial  
148 representations of a constant, empty environment (Supplemental Figure 2).

149 Next we examined whether the sensitivity of CA2 firing to contextual change<sup>19</sup> was  
150 sufficient to decode the changes in environmental content in the five sessions of the three-  
151 chamber task, and whether there were any differences in decoding ability of CA2 compared to  
152 CA1. Indeed, when we trained a linear decoder using CA2 population activity to determine in  
153 which session an animal was engaged, the decoder performed significantly better than chance.  
154 Moreover, the CA2-based decoder performed significantly better than the CA1-based decoder in  
155 identifying task session (Figure 3a,b).

156 The ability of CA2 activity to distinguish among the different sessions could result from a  
157 sensitivity of neuronal firing to the differences in environmental content (context) between  
158 successive sessions (e.g. presence of non-social or social cues). Alternatively, it could reflect a  
159 sensitivity of CA2 firing to the passage of time independent of environmental content<sup>15</sup>. To  
160 distinguish between these possibilities, we trained a decoder on CA2 activity in the 4 sessions of  
161 the 40 min habituation period, where there was no change in content but where the passage of  
162 time was similar to that in the three-chamber task. Although the decoder was able to distinguish  
163 among the four habituation sessions slightly above chance level ( $p=0.03$ ), decoder accuracy was  
164 significantly below that observed for the three-chamber task ( $p=0.01$ ; Figure 3a), with the ratio of  
165 performance accuracy to chance accuracy in the three-chamber task ( $2.1 \pm 0.09$ ) significantly  
166 larger than in the habituation sessions ( $1.2 \pm 0.06$ ;  $p=0.002$ , t-test). We thus conclude that CA2  
167 contains significant information about environmental content in addition to any information about  
168 the passage of time. This conclusion is further supported by our finding that CA2 place fields were

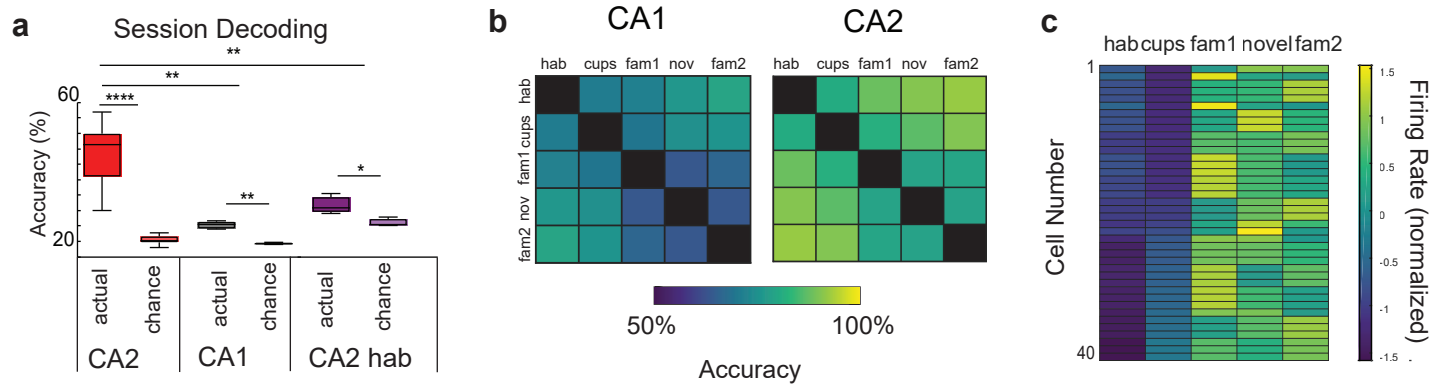

**Figure 3. CA2 encodes contextual changes and the presence of social stimuli.** (a) SVM decoder performance for identifying the particular session in which a mouse was engaged in the three-chamber task or during the four 10-min sessions of empty chamber habituation (hab). Decoder trained on either CA2 (dark red) or CA1 (dark grey) firing performed significantly better than chance (lighter shaded bars): CA2,  $p < 0.001$  ( $n=192$  neurons from 6 animals); CA1,  $p < 0.01$  ( $n=87$  neurons from 3yy animals). CA2 three-chamber session decoding accuracy was significantly greater than CA1 ( $p < 0.01$ , Wilcoxon rank-sum test). Decoder trained on CA2 activity during four 10-min sessions of habituation period predicted habituation session slightly above chance ( $p=0.03$ ,  $n=94$  neurons from 4 animals). Accuracy of habituation session decoding was significantly lower than that for three-chamber session decoding ( $p < 0.01$ ). The ratio of performance over chance accuracy was significantly higher in the three-chamber sessions ( $2.1 \pm 0.09$ ) compared to habituation sessions ( $1.2 \pm 0.06$ ;  $p=0.002$ ). (b) CA1 and CA2 color-coded decoding accuracy for all possible session pairs in three-chamber task. (c) 40/192 CA2 PNs significantly increased their firing rate in the presence of social stimuli (difference in normalized firing rate  $> 2$  standard deviations from the non-social sessions to the social sessions, see Supplemental Figure 2 for more information).

169 more stable in the 40 min habituation session compared to the three-chamber task (Figure 2 a,b)  
170 and by additional findings based on social coding properties presented below.

171

## 172 **A subset of CA2 cells increased their firing rate in the presence of a social stimulus**

173 We next explored whether CA2 firing was sensitive to the presence of another mouse (a  
174 social stimulus). The mean z-scored firing rate of CA2 neurons differed significantly among the  
175 non-social and social sessions of the three-chamber task (ANOVA;  $p=0.0004$ ), whereas CA1  
176 firing remained relatively constant (ANOVA  $p=0.29$ ). Moreover, 40/192 (~20%) of individual CA2  
177 neurons significantly increased their mean z-scored firing rate ( $>2$ ) during the social sessions (3-  
178 5) compared to the non-social sessions (1 and 2) (Figure 3c). In addition, 12 of the 40 neurons  
179 were initially silent (or nearly so) in the two preceding non-social sessions, with an initial firing rate  
180 in bottom 5% of the population ( $<0.007$  Hz; Supplemental Figure 3). The increase in activity did  
181 not reflect random shifts in firing as only 3/192 ( $<2\%$ ) of CA2 cells were significantly more active  
182 during the non-social sessions than the social sessions, and none fell silent during the social  
183 sessions. In contrast to the enhanced social firing of CA2 neurons, only 2/87 CA1 cells showed a  
184 significant increase in firing rate (z-score  $>2$ ) in the social sessions compared to the preceding  
185 non-social sessions, similar to the 3/87 fraction of CA1 cells that fired significantly more during  
186 the non-social sessions.

187 Previous studies have found that CA2 firing responds to both novel objects and social  
188 stimuli<sup>16</sup> whereas silencing of CA2 impairs social but not object memory<sup>11</sup>. These separate results  
189 suggest that objects and social stimuli may differentially engage CA2 firing. We thus examined  
190 whether the population response of CA2 firing to novel objects differed from its firing to social  
191 stimuli by comparing CA2 population firing in the session containing the wire cup cages (novel  
192 objects) to the sessions containing the social stimuli. For each CA2 neuron, we determined the  
193 change in z-scored firing rate between a given session (objects or social stimuli) and its initial  
194 firing rate in the empty arena (session 1) and then expressed this information as population firing



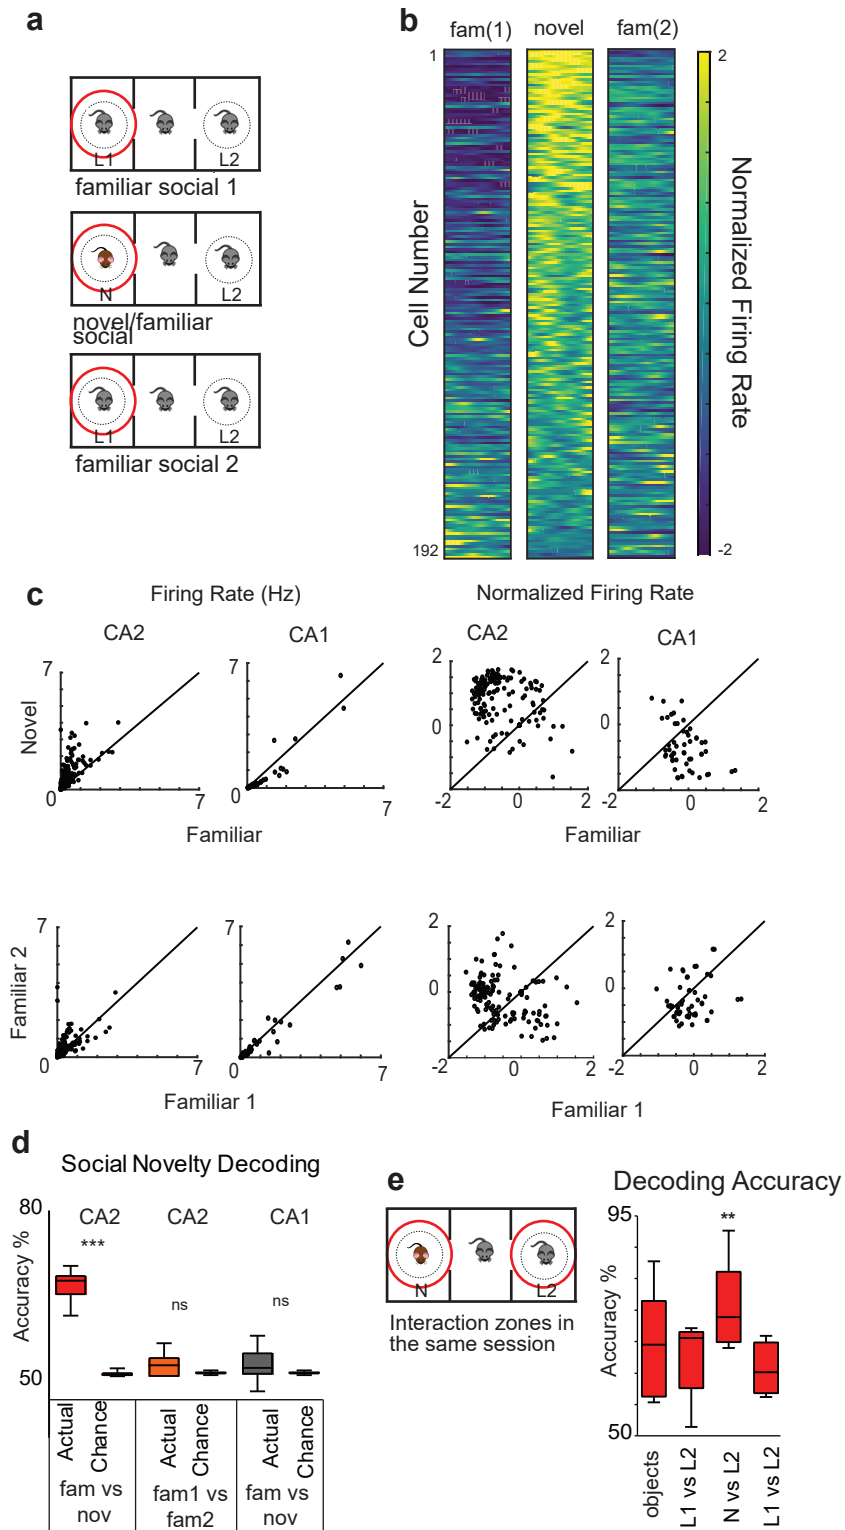

**Figure 4. CA2 encoding of social information.** (a) CA2 firing rate measured when the animal was within a 7 cm interaction zone around the cup that contained the novel animal. Same physical interaction zone used for all three social sessions (example shows the case in which the novel animal was in the left cup). (b) Mean z-scored firing rates during all social interactions in each of the three social sessions as function of time in interaction zone (192 neurons from 6 mice). Total Interaction time was divided into 50 time bins and firing rate was calculated for each bin to visualize a neuron's activity. (c) Plot of CA2 and CA1 neuron raw mean firing rates (left graphs) and z-scored mean firing rates (right graphs) in the interaction zone around the novel mouse versus the familiar littermate (the latter was averaged across the two familiar mouse sessions). Each point is a separate cell. (d) An SVM with a linear kernel trained on CA2 activity in the interaction zone performed significantly above chance in decoding interactions with a novel mouse (data from session 4) versus interactions with the familiar mouse (data from sessions 3 and 5;  $p < 0.0001$ , Wilcoxon rank-sum test;  $n=192$  neurons from 6 mice). The CA2-based decoder failed to distinguish interactions with the same familiar mouse in session 3 (fam1) versus session 5 (fam2). A decoder based on CA1 activity failed to distinguish interactions between the novel and familiar mouse. (e) Accuracy of a linear decoder trained to distinguish left from right interaction zones in the object, fam1, novel, and fam2 sessions of three-chamber task. Left-right decoding accuracy was above chance for all sessions ( $p < 0.01$ , Wilcoxon rank-sum test) and was significantly enhanced when the novel mouse was present ( $p < 0.01$ , Wilcoxon rank-sum test,  $n=192$  neurons from 6 mice).



195 rate vectors to the objects or social stimuli. There was a highly significant difference in the CA2  
196 population vectors for the firing rate changes in the object session compared to the social sessions  
197 ( $p= 5.8 \times 10^{-37}$ ; Wilcoxon rank-sums test), indicating that the population of CA2 neurons was  
198 indeed differentially responsive to the addition of a social stimulus compared to an inanimate  
199 object (Supplemental Figure 3).

200

### 201 **CA2 encodes social novelty**

202 To determine whether CA2 may encode specific social information that could contribute  
203 to social memory, we focused on CA2 firing while an animal was exploring within a body's length  
204 (7 cm) of the cups (the interaction zone), either with or without a caged mouse present (Figure  
205 4a). To limit potential spatial firing contributions, we compared CA2 firing among different  
206 sessions within a single interaction zone, defined by the cup that contained the novel mouse in  
207 session 4. We found that 77/192 CA2 PNs showed a significant ( $>2$  SD) increase in firing during  
208 interactions with a novel mouse compared to a familiar mouse, as seen in both color-coded plots  
209 of neuronal firing-rate versus time (Figure 4b) and in scatter plots of mean firing rates (Figure 4c).  
210 Some CA2 PNs maintained an increase in firing around the novel animal throughout the 10 min  
211 period of a given social session whereas other neurons increased their firing only transiently,  
212 during the initial encounters with the novel animal (Figure 4b). As a result of the contributions of  
213 such neurons, mean CA2 population z-scored firing rate when an animal was exploring within the  
214 interaction zone around a novel animal ( $0.83 \pm 0.06$ ) was significantly greater than the firing rate  
215 around the familiar littermate in the flanking sessions ( $-0.26 \pm 0.04$ ; Mann Whitney  $U < 0.0001$ )  
216 (Figure 4b,c). Moreover, the population firing rate vector around the novel animal also differed  
217 significantly from the firing rate vector around the familiar animal (averaged from sessions 3 and  
218 5;  $p < 0.0001$ , Wilcoxon rank-sum test).

219 In contrast to the enhanced firing to social novelty, individual CA2 neuron firing rates  
220 around the same familiar mouse in session 3 compared to session 5 did not differ significantly

221 (Figure 4b,c). Moreover, only a small fraction of cells showed a z-scored firing rate difference  
222 greater than 2 to the same familiar animal (5/192), similar to that predicted by chance for a normal  
223 distribution. Furthermore, there was also no significant difference in the two firing rate vectors to  
224 the same familiar animal ( $p > 0.05$ , Wilcoxon rank-sum test). These results indicate that the  
225 increased firing to a novel mouse compared to a familiar mouse measured across different  
226 sessions was not simply due to the passage of time or CA2 variability (as the difference in time  
227 between the two familiar mouse sessions was twice that in the novel versus familiar mouse  
228 sessions). Finally, the increase in firing rate around the novel animal was not observed for CA1  
229 neurons under the same conditions (Figure 4c, Supplemental Figure 4), confirming results from  
230 Rao and colleagues<sup>30</sup>. Thus, not only does CA2 firing respond to a social stimulus, but CA2 firing  
231 is further enhanced in the presence of social novelty. Moreover, this effect is subfield specific,  
232 consistent with the importance of dorsal CA2<sup>11,31</sup> but not dorsal CA1<sup>13</sup> in social memory formation.

233 Is the increase in CA2 firing specific during interactions with a novel social stimulus or  
234 does CA2 firing also increase during interactions with a novel object? As the wire cup cages  
235 represented novel objects to the mice, we asked whether CA2 firing rates were higher when a  
236 mouse was within the interaction zone surrounding the cups in session 2 compared to when the  
237 mouse occupied the same location in the empty arena session 1. We did observe a small but  
238 significant increase in CA2 z-scored firing rate as mice explored around the novel objects ( $0.40 \pm$   
239  $0.06$ ) compared to the empty arena ( $-0.48 \pm .05$ ;  $p < 0.01$ , Wilcoxon rank-sum test). However, the  
240 increased firing around the novel animal ( $0.83 \pm 0.06$ ) was significantly greater than that around  
241 the novel object ( $p = 0.009$ , Wilcoxon rank-sum test; Supplemental Figure 4). Thus, although CA2  
242 firing rate increased to both social and non-social novel stimuli, the response was significantly  
243 greater for social novelty.

244 To explore further the social information content in CA2 firing, we asked whether a linear  
245 decoder could detect the presence of a familiar mouse versus a novel mouse based on CA2  
246 activity in the same interaction zone around the novel animal in session 4 and the familiar animal

247 in session 3 and 5 that occupied the same cup containing the novel animal (Figure 4d). Indeed,  
248 CA2 population activity accurately decoded social interactions with the novel versus familiar  
249 mouse among the three social sessions. In contrast, social novelty could not be decoded from  
250 CA1 population activity. Importantly, CA2 activity failed to distinguish interactions with the same  
251 familiar mouse in session 3 compared to session 5. This further confirmed that CA2 responses to  
252 specific social stimuli were responsible for driving decoder performance as opposed to a purely  
253 time-dependent change in CA2 firing patterns over the various sessions.

254 As an additional probe of CA2 information content, we determined whether a decoder  
255 could discriminate in a single session whether a subject mouse was exploring within the  
256 interaction zone around the cup in the left chamber versus the cup in the right chamber, a  
257 comparison that can incorporate both spatial and non-spatial cues (Figure 4e). In all four sessions  
258 that contained the identical cups (sessions 2-5), the decoder was able to determine whether an  
259 animal was exploring within the left versus right interaction zones at a level significantly better  
260 than chance. The ability of CA2 firing to decode left from right with two identical objects present  
261 suggests that CA2 firing may contain coarse spatial information (although it is possible that  
262 decoder performance is driven by subtle physical differences in the nominally “identical” objects).  
263 Of interest, left-right decoder performance was significantly enhanced in the novel-familiar mice  
264 session compared to either the object session or the two familiar mice sessions (Figure 4e),  
265 supporting the view that CA2 firing contained significant information on social novelty.

266

### 267 **CA2 neurons in *Df(16)A<sup>+/-</sup>* mice showed altered spatial, contextual and social firing**

268 If the firing properties of CA2 neurons are relevant for social cognition, we might expect  
269 CA2 activity to be altered in models of neuropsychiatric disease with known deficits in social  
270 memory. To test this possibility, we recorded the activity of 128 CA2 neurons during the three-  
271 chamber task from five *Df(16)A<sup>+/-</sup>* mice (Figure 5a; Supplemental Table 1, Supplemental Figure  
272 5). Such mice were previously found to have a deficit in social memory that is associated with a

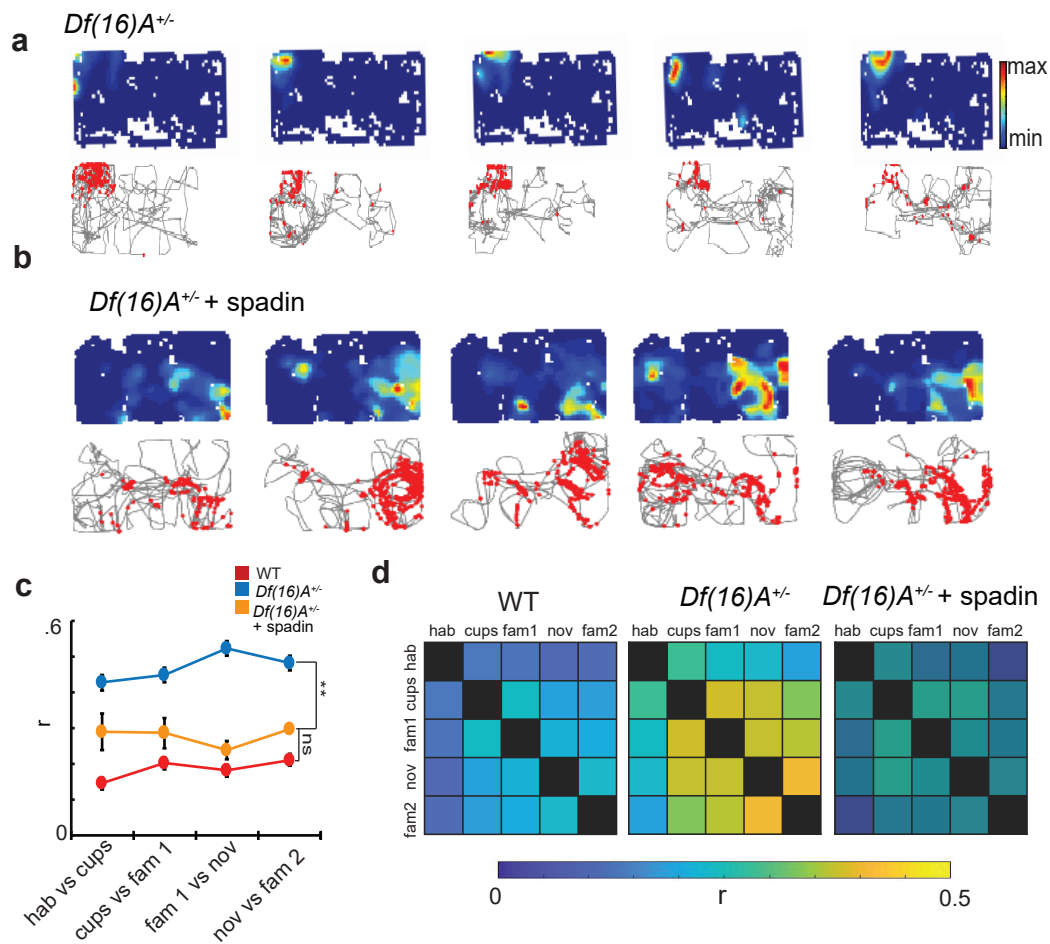

**Figure 5. Spatial firing of CA2 neurons in *Df(16)A<sup>+/-</sup>* mice and effect of systemic injection of TREK-1 antagonist spadin.** (a) Example CA2 spatial firing across the 5 sessions of the three-chamber task from *Df(16)A<sup>+/-</sup>* mice. CA2 example neuron spatial firing (maximum firing rates in sessions 1-5 were: 5, 2, 4, 2, and 2 Hz). (b) CA2 example neuron firing from a *Df(16)A<sup>+/-</sup>* mouse 30 min after injection of spadin (maximum firing rates in sessions 1-5 were: 2, 7, 17, 2, and 12 Hz). (c,d) Place field stability between pairs of consecutive sessions (c) and between all sessions (d) in wild-type mice (same data as in Figure 2) compared to *Df(16)A<sup>+/-</sup>* mice in the absence (n=128 neurons from 5 mice) and presence (n=91 neurons from 5 mice) of spadin.

273 late developmental decrease in density of PV<sup>+</sup> inhibitory neurons within CA2, resulting in  
274 decreased CA2 synaptic inhibition<sup>22</sup>. CA2 pyramidal neurons of these mice also displayed a  
275 negative shift in their resting potential as a result of an increase in TREK-1 K<sup>+</sup> channel resting  
276 current<sup>22</sup>. We therefore also examined whether any alterations in CA2 firing and/or social memory  
277 deficit in these mice could be rescued by the selective TREK-1 peptide antagonist spadin<sup>32</sup>, using  
278 a different group of *Df(16)A*<sup>+/-</sup> mice (91 cells from 5 mice).

279 We found that the mean firing rate of CA2 neurons from *Df(16)A*<sup>+/-</sup> mice during the five  
280 sessions of the three-chamber task was significantly decreased compared to that in two groups  
281 of wild-type mice, unrelated wild-type mice of the same C57Bl/6J genetic background and wild-  
282 type littermates (Supplemental Figure 6b). This suggests that the inhibitory effect of CA2  
283 pyramidal neuron hyperpolarization may predominate over the excitatory effect of decreased  
284 feedforward inhibition. Surprisingly, we also found that the spatial coding properties of CA2  
285 neurons in the mutant strain were significantly enhanced so that they more closely resembled the  
286 spatial coding characteristic of CA1 pyramidal cells (Figure 5, Supplemental Figure 5). Thus, CA2  
287 neuron spatial firing in *Df(16)A*<sup>+/-</sup> mice showed a significant increase in stability across the  
288 sessions of the three-chamber task in (Figure 5c,d). Moreover, the CA2 PNs had fewer and larger  
289 place fields with a higher average spatial information and selectivity compared to wild-type mice  
290 (Supplemental Figure 5c-f). The increase in place field stability was not due to the increase in  
291 field size, as the y-axis intercept of the regression line for a plot of field size versus stability<sup>33</sup> was  
292 significantly higher for *Df(16)A*<sup>+/-</sup> animals (*Df(16)A*<sup>+/-</sup> = 0.29 ± 0.032; wild-type = 0.15 ± 0.028; p <  
293 0.001, ANCOVA).

294 As a further indication of improved spatial coding, we found that spatial location could be  
295 determined at a level significantly better than chance by a linear decoder trained on CA2 PN  
296 population activity in the *Df(16)A*<sup>+/-</sup> mice (Figure 6a,b), in contrast to the poor decoder performance  
297 based on CA2 activity in wild-type mice (Figure 2d). Finally, although spatial decoding abilities of

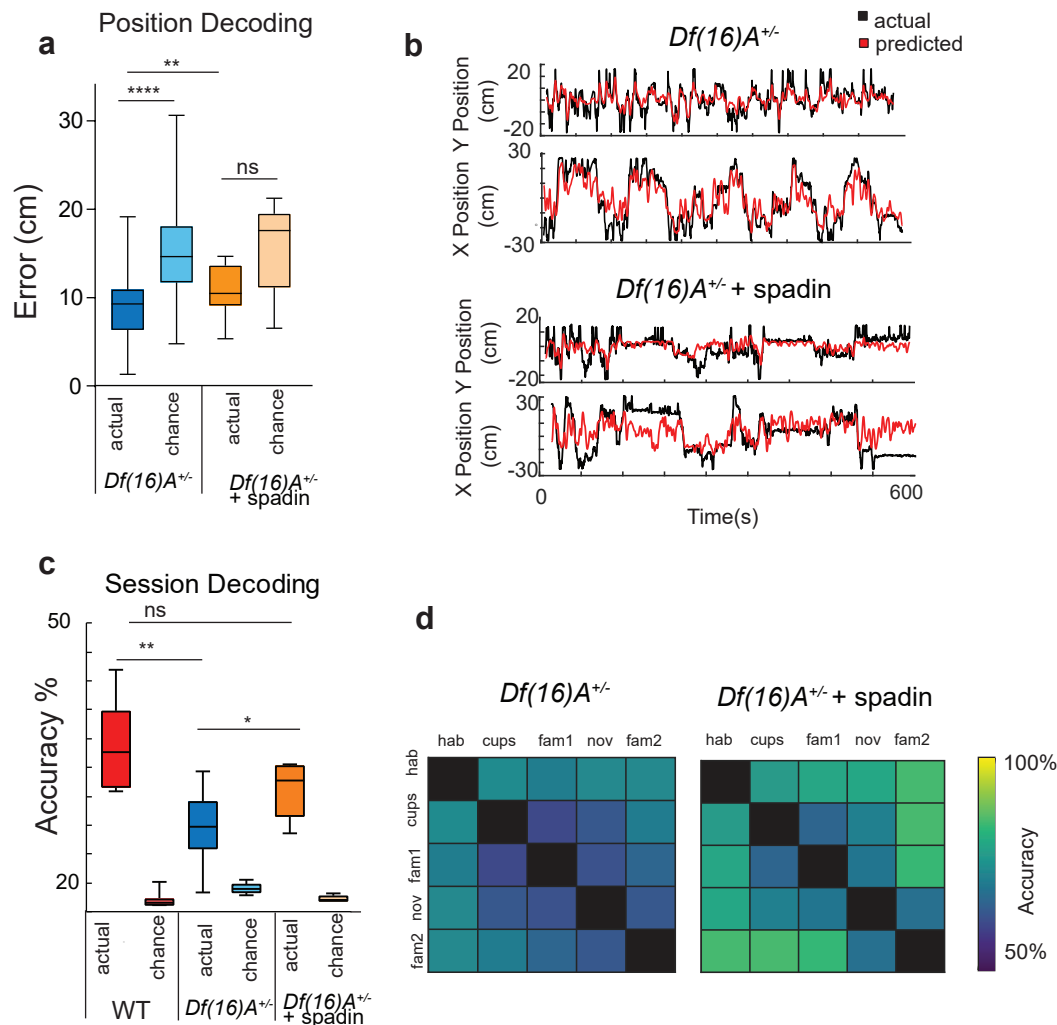

**Figure 6. CA2 population activity decoding of position and session in *Df(16)A<sup>+/-</sup>* mice and the effect of spadin.** (a,b) Position of the animal was decoded significantly better than chance ( $p < 0.001$ , Wilcoxon rank-sum test) from CA2 population activity in *Df(16)A<sup>+/-</sup>* mice ( $n=128$  neurons from 5 mice). Spadin decreased decoding accuracy ( $p < 0.01$ , Wilcoxon rank-sum test) to chance levels ( $n=91$  neurons from 5 mice). (c) Overall CA2 decoding accuracy for session in three-chamber task (context) is impaired in *Df(16)A<sup>+/-</sup>* mice compared to wild-type mice ( $p < 0.01$ , Wilcoxon rank-sum test), although it is significantly greater than chance ( $p < 0.05$ , Wilcoxon rank-sum test). Treatment with spadin significantly increased session decoding performance ( $p < 0.01$ , Wilcoxon rank-sum test). (d) Decoding accuracy for pairs of sessions in absence and presence of spadin.

298 CA2 firing in *Df(16)A<sup>+/-</sup>* mice was enhanced, the ability of CA2 activity to decode session was  
299 significantly impaired (Figure 6c,d), implying a deficit in contextual coding.

300 Are the social coding properties of CA2 neurons also altered in the *Df(16)A<sup>+/-</sup>* mice?  
301 Indeed, we found a significant impairment in the ability of CA2 activity from these mice to encode  
302 social information and social novelty (Figure 7). Thus, CA2 neurons of *Df(16)A<sup>+/-</sup>* mice failed to  
303 show an increase in firing around a novel social stimulus (Figure 7b,c; compare with Figure 4b,c).  
304 In addition, the CA2 population normalized firing rate around the novel mouse in session 4 was  
305 did not differ from the population firing rate around the familiar mouse in either session 3 or 5  
306 (Figure 7b,c;  $p > 0.05$ , Kruskal Wallis). This is in distinction to the significant difference in firing rate  
307 vectors we observed for wild-type mice when exploring a familiar versus novel mouse (Figure  
308 4b,c). In addition, only 3/128 CA2 PNs showed a significant increase ( $> 2$  SD) in normalized firing  
309 rate when interacting with a novel animal compared to a familiar one (Figure 7c), in contrast to  
310 the 20% of cells in wild-type mice that increased their firing rate in response to social novelty  
311 (Figure 4b,c).

312 Next we examined social coding properties of CA2 in *Df(16)A<sup>+/-</sup>* mice by training a linear  
313 decoder on CA2 population activity during periods of exploration within the same interaction zone  
314 around a novel or a familiar mouse, as described above. Although the decoder was able to  
315 distinguish interactions with the novel versus familiar mouse, decoder performance was only  
316 barely above chance levels ( $p = 0.04$ , Wilcoxon rank-sum test). Importantly, the decoder showed  
317 no improvement in its ability to discriminate between interactions with the novel versus familiar  
318 mouse (session 4 versus sessions 3 and 5) compared to its ability to discriminate between  
319 interactions with same familiar mouse in sessions 3 versus 5 (Figure 7e;  $p = 0.36$ , Wilcoxon rank-  
320 sum test). This contrasts with the effect of social novelty to significantly enhance decoder  
321 performance in wild-type mice (Figure 4d). Thus, CA2 activity in the *Df(16)A<sup>+/-</sup>* mice had a reduced  
322 response to a social stimulus and social novelty, consistent with the deficit in social memory of  
323 these mice.



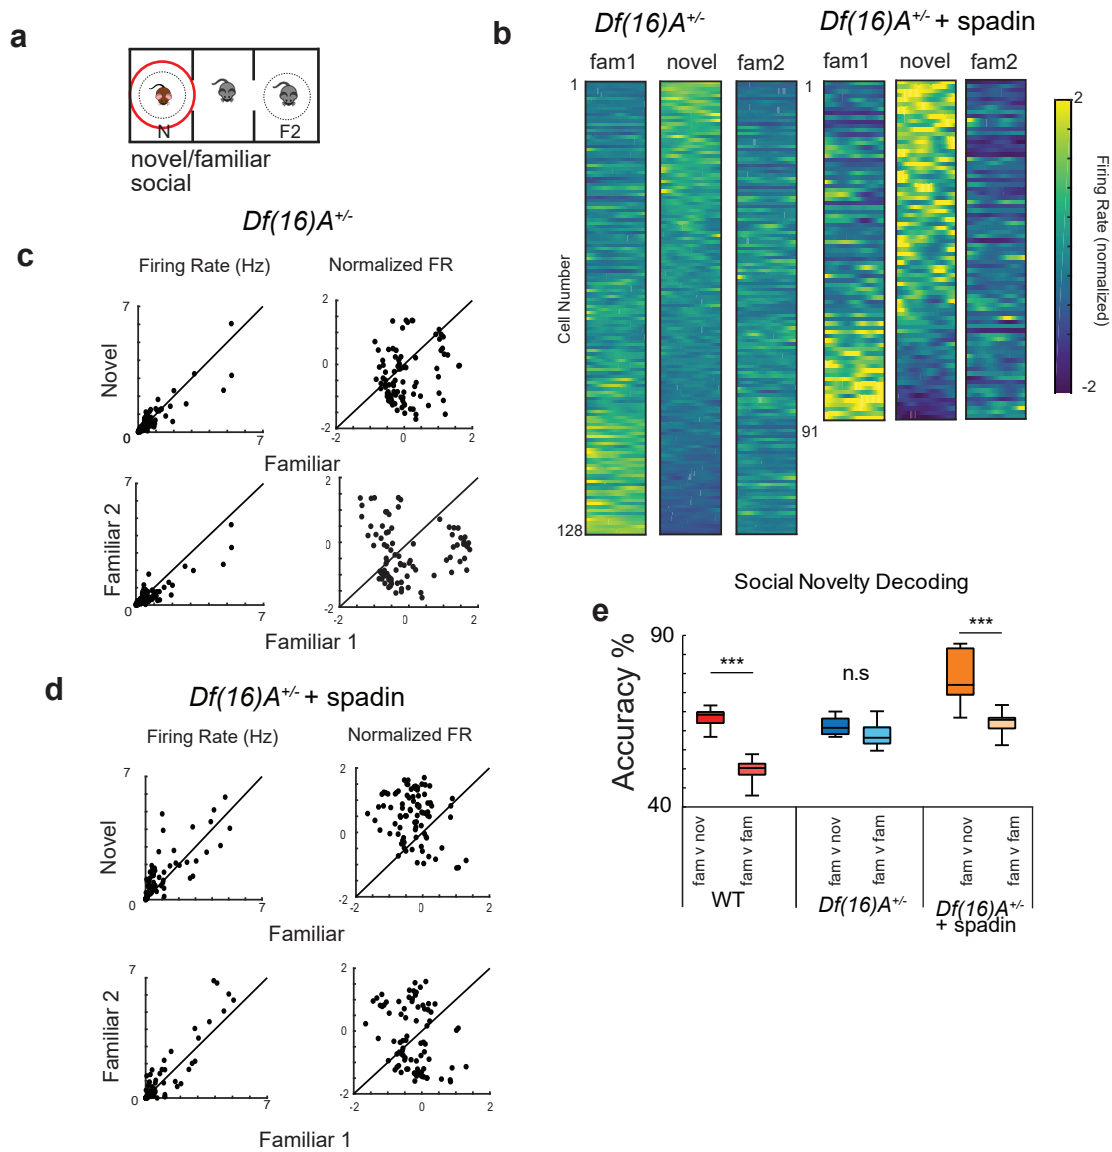

**Figure 7. Social coding deficits in *Df(16)A<sup>+/-</sup>* mice and its rescue by spadin.** (a) CA2 firing was analyzed in the interaction zone defined by the cup containing the novel animal in three social sessions. (b) Z-scored CA2 firing rates for each cell during social sessions as a function of time in the interaction zone in untreated (left, n=128 neurons from 5 mice) and spadin-treated (right, n=91 neurons from 5 mice) *Df(16)A<sup>+/-</sup>* mice. (c),(d) Comparison of CA2 neuron firing rates in *Df(16)A<sup>+/-</sup>* animals in interaction zone around the novel versus familiar mouse (top) or during interactions with the same familiar mouse in session 3 versus 5 (bottom). Graphs on left show mean firing rates (Hz); graphs on right show mean z-scored firing rates. (c) Firing in absence of drug; (d) Firing in presence of spadin. (e) Accuracy by which CA2 activity decoded interactions with the familiar versus novel mouse (fam v nov) and with same familiar mouse in sessions 3 versus 5 (fam v fam). Data shown for wild-type mice (same as Figure 3d) compared to *Df(16)A<sup>+/-</sup>* mice in absence and presence of spadin. Decoding for novel versus familiar social stimuli was significantly greater than decoding for the same familiar mouse in wild-type and spadin-treated *Df(16)A<sup>+/-</sup>* mice ( $p < 0.001$ , Wilcoxon rank-sum test), but not in untreated *Df(16)A<sup>+/-</sup>* mice ( $p > 0.05$ , Wilcoxon rank-sum test).



324

325 **TREK-1 inhibition rescued social memory and CA2 social coding deficits in *Df(16)A<sup>+/-</sup>* mice**

326 To what extent can the changes in CA2 firing in the *Df(16)A<sup>+/-</sup>* mice be rescued by inhibition  
327 of TREK-1 K<sup>+</sup> current<sup>21</sup>? Do the alterations in CA2 firing observed above actually contribute to the  
328 social memory deficit of the *Df(16)A<sup>+/-</sup>* mice? We addressed these questions by investigating the  
329 effects on CA2 firing properties and social memory behavior of systemic injection of spadin, a  
330 naturally occurring selective peptide antagonist of TREK-1<sup>31</sup>. We found that the changes in CA2  
331 spatial, contextual and social firing properties were largely rescued when *Df(16)A<sup>+/-</sup>* mice were  
332 injected intraperitoneally with 0.1 ml of 10<sup>-5</sup> M spadin 30 min prior to testing (Figures 5-7;  
333 Supplemental Figure 5b-f) . In contrast, injection of a control group of *Df(16)A<sup>+/-</sup>* mice with saline,  
334 the spadin vehicle, had no effect on CA2 firing (Supplemental Figure 6).

335 Spadin administration increased CA2 neuron mean firing rate throughout the five sessions  
336 of the three-chamber task to wild-type values (Supplemental Table 1, Supplemental Figure 5b),  
337 consistent with the idea that the decreased firing rate in *Df(16)A<sup>+/-</sup>* mice was caused by TREK-1  
338 upregulation. Compared to untreated *Df(16)A<sup>+/-</sup>* mice, CA2 neurons in spadin-treated *Df(16)A<sup>+/-</sup>*  
339 mice had more plentiful but smaller place fields (Figure 5b; Supplemental Figure 5c,d) that were  
340 less stable across sessions (Figure 5c,d), properties more similar to CA2 firing properties in wild-  
341 type animals. Notably, spadin also decreased the spatial selectivity and information content of  
342 CA2 PN firing (Supplemental Figure 5e,f, Supplemental Table 1). In addition, spadin decreased  
343 position decoding performance in the *Df(16)A<sup>+/-</sup>* mice to chance levels (Figure 6a,b), as found for  
344 wild-type mice (Figure 2d). In contrast to its effects to degrade CA2 spatial information coding,  
345 spadin enhanced the ability of CA2 population activity to decode three-chamber task session in  
346 which a mouse was engaged, thus rescuing CA2 contextual coding (Figure 6c,d).

347 Does TREK-1 antagonism with spadin also rescue the social coding properties of CA2?  
348 Indeed, following spadin treatment CA2 firing in *Df(16)A<sup>+/-</sup>* mice around a novel mouse was now  
349 significantly greater than firing around a familiar mouse (Figure 7a-d), with 33/91 cells showing a

350 significant ( $>2$  SD) increase (Figure 7d), similar to the findings in wild-type mice (Figure 4).  
351 Moreover, in the presence of spadin, the CA2 population firing rate vector around the novel versus  
352 familiar mice differed significantly ( $p, 0.01$ , Wilcoxon rank-sum test), similar to our findings in wild-  
353 type mice but in contrast to uninjected or saline-injected *Df(16)A<sup>+/-</sup>* mice (Figure 7b,d;  
354 Supplemental Figure 6). Finally, spadin injection rescued the normal finding that decoder  
355 performance in discriminating a novel from a familiar mouse was greater than decoder  
356 performance in discriminating the same familiar mouse in session 3 versus session 5 (Figure 7e).  
357

### 358 **Systemic and CA2-selective TREK-1 inhibition rescues social memory in *Df(16)A<sup>+/-</sup>* mice**

359 If the social memory deficit in the *Df(16)A<sup>+/-</sup>* mice was related to impaired CA2 social  
360 coding, we would expect that spadin should also rescue social memory given its ability to rescue  
361 CA2 social coding. We first explored social memory performance using a direct interaction test  
362 (Figure 8a-d). In this test, a subject mouse was first exposed to a novel stimulus mouse for 2 min  
363 in trial 1. The mice were then separated for 30 min and the subject mouse was then re-introduced  
364 to the now familiar stimulus mouse for 2 min in trial 2. In wild-type mice social memory is normally  
365 expressed as a decrease in interaction time with the stimulus mouse in trial 2 relative to trial 1,  
366 reflecting the decrease in social novelty. Whereas saline-treated *Df(16)A<sup>+/-</sup>* mice showed no  
367 decrease in social exploration in trial 2, indicative of a loss of social memory, *Df(16)A<sup>+/-</sup>* mice  
368 treated with spadin showed a significant decrease in social interaction time in trial 2, similar to  
369 that seen in wild-type mice treated with saline or spadin (Figure 8a-d). Importantly, spadin-treated  
370 *Df(16)A<sup>+/-</sup>* mice showed no decrease in interaction time when a second novel mouse was  
371 introduced in trial 2, showing that the decrease in interaction to the same mouse encountered in  
372 trial 1 was due to decreased social novelty associated with social memory, and not simply task  
373 fatigue (Supplemental Figure 7b). We also found that spadin rescued social memory performance  
374 during *Df(16)A<sup>+/-</sup>* mouse social interactions in the three-chamber task (Supplemental Figure 7d-f).

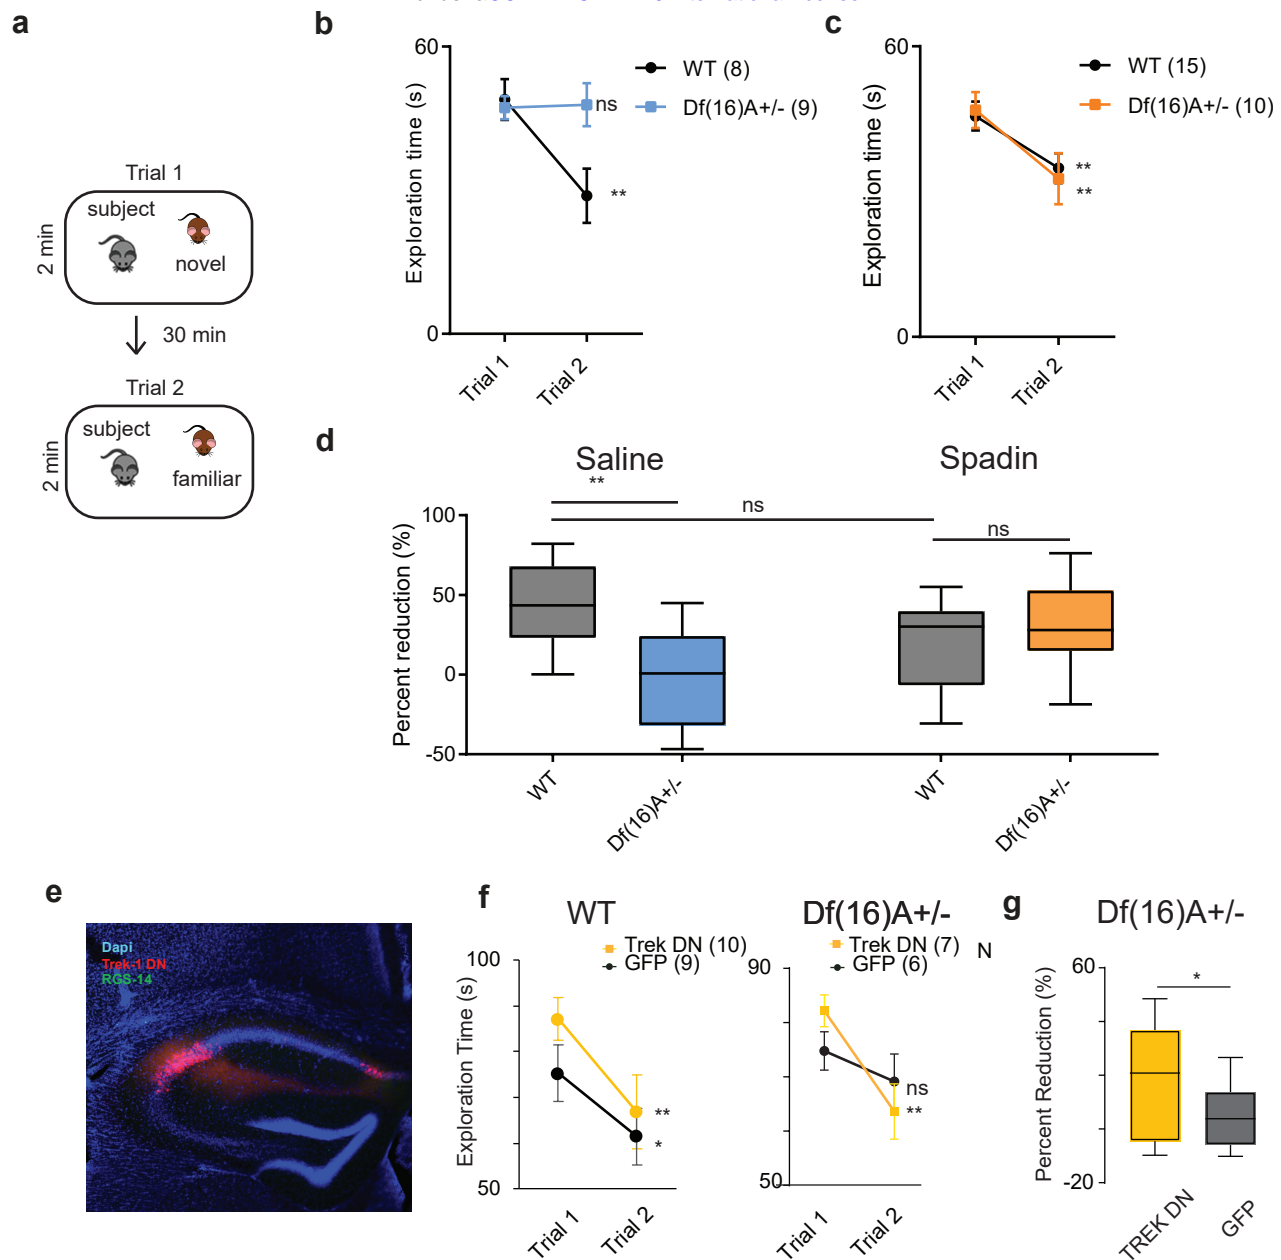

**Figure 8. Effect of TREK-1 inhibition on social memory deficits in Df(16)A+/- mice.** (a) The direct interaction task. Trial 1, A subject mouse was presented with a novel stimulus mouse for 2 min. The novel mouse was then removed from the cage. Trial 2, After 30 min the same (now familiar) stimulus mouse is reintroduced. (b) Wild-type mice injected with saline showed a decreased interaction time in trial 2 compared to trial 1 ( $p < 0.01$ , paired t-test,  $n=8$  mice). Df(16)A+/- mice injected with saline showed no decrease in interaction time ( $p > 0.05$ ,  $n=9$  mice). (c) In mice injected with spadin 30 min prior to trial 1, interaction time in trial 2 compared to trial 1 decreased significantly for both wild-type ( $p < 0.01$ , paired t-test,  $n=15$  mice) and Df(16)A+/- mice ( $p < 0.01$ , paired t-test,  $n=10$  mice). (d) Percent reduction in interaction time is significantly lower in saline-treated Df(16)A+/- mice than other experimental groups (ANOVA,  $p=0.009$ ). Spadin-treated Df(16)A+/- mice do not differ from saline- or spadin-treated wild-type mice ( $p=0.37$ , paired t-test). (e) Immunohistochemistry showing viral mediated expression in CA2 (identified by CA2 marker RGS-14, green signal) of TREK-1 DN tagged with GFP (TREK-1 DN, red signal). (f,g) Social memory in wild-type and Df(16)A+/- mice expressing TREK-1 DN or GFP (control) in CA2. There was a significant decrease in interaction time in trial 2 for wild-type mice expressing TREK-1 DN ( $p=0.005$ ,  $n=10$  mice) or GFP ( $p=0.03$ ,  $n=9$  mice) and for Df(16)A+/- mice expressing TREK-1 DN ( $p=0.001$ ,  $n=7$  mice) but not GFP ( $p=0.07$ ,  $n=6$  mice; paired t-tests for all comparisons).

375           Because the effects of spadin were observed following systemic injection, it was important  
376 to determine whether its behavioral effect resulted from a specific action in CA2 or was mediated  
377 by effects on some other brain region. We therefore we injected a TREK-1 dominant negative  
378 virus (Trek-1 DN)<sup>34</sup> in CA2 of *Df(16)A<sup>+/-</sup>* and wild-type mice to decrease TREK-1 K<sup>+</sup> current  
379 selectively in this region. To further limit expression to CA2 we used AAV2/5, whose serotype  
380 causes it to have a natural tropism to infect CA2 compared to neighboring CA1 or CA3 regions<sup>35</sup>.  
381 We found that *Df(16)A<sup>+/-</sup>* animals expressing TREK-1 DN in CA2 showed a significant  
382 improvement in social memory in the direct interaction test, manifest as a decreased social  
383 exploration of the now-familiar stimulus mouse in trial 2, as compared to control *Df(16)A<sup>+/-</sup>* animals  
384 expressing GFP (Figure 8g-i). Moreover, mice expressing TREK-1 DN showed no decrease in  
385 interaction time between trial 1 and trial 2 when a novel animal was introduced on trial 2, indicating  
386 that the decreased interaction time to the familiar mouse in trial 2 was not due to fatigue  
387 (Supplemental Figure 7c). As a further control, we found that injection of the TREK-1 DN virus in  
388 CA2 did not alter social memory performance in wild-type mice (Figure 8f).  
389  
390

## 391 Discussion

392 Here we report that the firing of dorsal CA2 pyramidal neurons, which play a critical role  
393 in social memory, was enhanced during an animal's interactions with a novel compared to a  
394 familiar conspecific. At the population level, CA2 activity successfully decoded both social and  
395 non-social contexts and discriminated between interactions with a novel versus a familiar mouse.  
396 These changes in firing could reflect coding of social novelty or the increased salience of a novel  
397 social stimulus compared to a familiar social stimulus. As novel conspecifics are generally  
398 extremely salient stimuli, deficits in encoding of salience could also lead to social behavioral  
399 deficits. While we found evidence for highly significant social and contextual coding in CA2, the  
400 same neurons provided at best a weak representation of spatial information at either the single  
401 cell or population level, especially compared to their neighboring CA1 neurons. Although most  
402 discussions of hippocampal firing focus on location-based measures, our results indicate that this  
403 fails to capture the most salient aspects of CA2 firing, especially when contextual elements in an  
404 environment are changed, with the presence of a novel conspecific eliciting the strongest  
405 response.

406 Although CA2 activity was clearly responsive to social stimuli, our experiments were not  
407 designed to reveal whether the firing of individual CA2 neurons or the CA2 population contained  
408 a representation for a social engram that encodes the social identity of a familiar conspecific,  
409 enabling an animal to distinguish one familiar conspecific from another. Okuyama et al (2016)  
410 reported that a subclass of neurons in ventral CA1 that project to the shell of the nucleus  
411 accumbens do form a social engram, with about 10% of neurons selectively active during  
412 interactions with a specific familiar mouse. Moreover, these authors found that such neurons were  
413 necessary and sufficient to encode and retrieve a social memory. Unlike our results in dorsal CA2,  
414 ventral CA1 neurons were not reported to increase their firing in response to social novelty. This  
415 is perhaps surprising as our laboratory found that dorsal CA2 provides excitatory input to the  
416 same subset of ventral CA1 that Okuyama et al identified and that this CA2 input is necessary for

417 encoding social memory<sup>31</sup>. How the novel social coding in dorsal CA2 is transformed into familiar  
418 specific firing in ventral CA1 remains an open question, although the dorsal CA2 inputs do recruit  
419 substantial feedforward inhibition in ventral CA1.

420 Evidence in support of an important behavioral role of the CA2 social firing properties  
421 came from our analysis of the *Df(16)A*<sup>+/-</sup> mouse model of the human 22q11.2 deletion syndrome.  
422 Consistent with the profound deficit these mice exhibit in both contextual fear memory<sup>36</sup> and in  
423 social memory<sup>22</sup>, we found that the firing of CA2 pyramidal neurons in these mice show  
424 diminished contextual and social responses and have a reduced ability to decode context or social  
425 novelty. Surprisingly, we found that CA2 activity in these mice had improved spatial encoding  
426 properties, including increased place field stability and spatial selectivity that was associated with  
427 an improved ability to decode spatial location.

428 At the cellular level, CA2 neurons in the *Df(16)A*<sup>+/-</sup> mice were previously found to have  
429 decreased feedforward synaptic inhibition in response to activation of their CA3 Schaffer collateral  
430 inputs and a more negative resting potential compared to control mice<sup>22</sup>. The latter effect was  
431 proposed to result from an upregulation of the resting K<sup>+</sup> current carried by TREK-1 channels<sup>22</sup>,  
432 whose mRNA expression is normally highly enriched in CA2 relative to other hippocampal  
433 regions<sup>37</sup>. These two cellular effects should have opposing actions on CA2 firing, with decreased  
434 inhibition enhancing and hyperpolarization suppressing CA2 activity. Our finding that mean CA2  
435 firing rate was significantly decreased in the mutant mice indicates that the net effect of the cellular  
436 alterations may be dominated by membrane hyperpolarization. Consistent with this view, we  
437 found that decreasing TREK-1 current by injection of the TREK-1 antagonist spadin or injection  
438 of a TREK-1 DN virus in the *Df(16)A*<sup>+/-</sup> animals resulted in a rescue of their social memory deficits.

439 At present, the molecular mechanisms linking the loss of genes found in the microdeletion  
440 to the upregulation of TREK-1 current remain unknown. It is possible that certain gene products  
441 in the locus could normally suppress TREK-1 expression, for example as found for the effect of  
442 micro RNA 185, which leads to the derepression of its gene target *Mirta22*<sup>38</sup>. Alternatively, as

443 TREK-1 channel activity is regulated by a number of intracellular signaling cascades<sup>39</sup> the effects  
444 on TREK-1 current could be indirect as a result of altered CA2 firing due to decreased inhibition  
445 or altered activity in a modulatory input to CA2.

446 Why should selective TREK-1 inhibition produce an effective rescue of both social memory  
447 behavior and CA2 firing properties in the *Df(16)A*<sup>+/-</sup> mice given that TREK-1 antagonism is not  
448 expected to restore the normal level of synaptic inhibition? The two major excitatory inputs to  
449 dorsal CA2 pyramidal neurons come from entorhinal cortex layer II stellate cells through the  
450 perforant path and from hippocampal CA3 pyramidal neurons via the Schaffer collaterals,  
451 although the net excitatory action of the latter inputs is normally suppressed by strong feedforward  
452 inhibition. Of interest, Piskorowski and colleagues<sup>22</sup> found that the decrease in CA2 feedforward  
453 inhibition in the *Df(16)A*<sup>+/-</sup> mice was selective for the Schaffer collateral inputs, with no change in  
454 feedforward inhibition through the entorhinal cortical inputs. Thus, if CA2 were to normally receive  
455 its major social information from the entorhinal cortical inputs as opposed to CA3, the rescue of  
456 CA2 neuron hyperpolarization could well be sufficient to restore normal levels of CA2 social  
457 information processing. That social information may arrive via the direct cortical inputs as opposed  
458 to CA3 is consistent with a recent study showing that silencing dorsal CA3 did not affect social  
459 memory<sup>40</sup>.

460 To our knowledge, our results provide the first instance of a mechanism-based  
461 pharmacological rescue of the social deficits in a mouse genetic model of schizophrenia. This  
462 finding is notable given the difficulty in treating the negative symptoms of schizophrenia, including  
463 social withdrawal. Spadin administration also rescued the social coding deficits seen in *Df(16)A*<sup>+/-</sup>  
464 CA2 activity. Interestingly, spadin administration, in addition to rescuing social and contextual  
465 coding, reverted the spatially selective firing properties of CA2 neurons to the less precise spatial  
466 firing characteristic of CA2 in wild-type mice. This suggests that the increased spatial stability in  
467 the *Df(16)A*<sup>+/-</sup> mice may actually contribute to impaired social coding by altering the normal mixed



468 selectivity of CA2 encoding to social, spatial, contextual and temporal signals to a more selective  
469 coding mode dominated by spatial information.

470         The apparent gain-of-function of improved CA2 spatial coding in the *Df(16)A<sup>+/-</sup>* mice was  
471 surprising, although pathological hyperstability of place fields has also been described in the *Fmr1*  
472 KO mouse model of fragile X syndrome<sup>41</sup>. Moreover, the *Df(16)A<sup>+/-</sup>* mice were previously found to  
473 have deficits in reward-related remapping of CA1 place fields<sup>42</sup>. The more stable spatial firing in  
474 CA2 of the *Df(16)A<sup>+/-</sup>* mice may reflect a deficit in remapping in response to altered context.  
475 Perhaps the pyramidal cell hyperpolarization may render CA2 neurons less sensitive to weak  
476 excitatory or neuromodulatory inputs that convey contextual information. In addition, the loss of  
477 CA2 feedforward inhibition through the Schaffer collateral input may shift the balance of excitatory  
478 input to favor the more spatially oriented information conveyed by CA3. Finally, as CA2 is enriched  
479 in receptors for the social neuropeptides oxytocin<sup>43</sup> and vasopressin<sup>44-46</sup>, improper integration of  
480 these social signals could contribute to the behavioral and social coding deficits seen in the  
481 *Df(16)A<sup>+/-</sup>* mice.

482         Our results provide further support that CA2 and its malfunction contributes importantly to  
483 normal social behavior and to social behavioral abnormalities characteristic of certain  
484 neuropsychiatric disorders, including schizophrenia. Moreover, our findings emphasize the  
485 potential importance of CA2 and TREK-1 as a target for novel therapeutic approaches to treating  
486 social endophenotypes associated with these disorders. Finally, the strong and consistent  
487 correlation we observe between CA2 firing properties and social memory behavior in wild-type  
488 mice, *Df(16)A<sup>+/-</sup>* mice, and *Df(16)A<sup>+/-</sup>* mice treated with spadin provides additional support for the  
489 view that CA2 social firing properties contribute to the role of this region in the encoding, storage  
490 and recall of social memory.

491

492



493 **Acknowledgements**

494 We would like to thank Joseph Gogos for initially providing the Df(16)A<sup>+/-</sup> mice and for ongoing  
495 advice and guidance. We thank Yuichiro Matsushita of Ono Pharmaceuticals for suggesting we  
496 study the action of spadin. We also thank Y. Mara Zafrina, Ambar Kleinbort, and Hannah G. Yueh  
497 for their technical support, Bina Santoro for assistance with and animal breeding, and C. Daniel  
498 Salzman and Dmitry Aranov for helpful discussions and comments on the manuscript. This work  
499 was supported by a grant from NSF GRFP to M.L.D., grants R01MH104602 and R01MH106629,  
500 S.A.S, P.I., support from the Zegar Family Foundation, and a grant from Ono Pharmaceuticals.

501

502 **Author Contributions**

503 M.L.D, J.A.G, S.F, and S.A.S designed the experiments and analyses. M.L.D. performed the in  
504 vivo recordings and M.L.M and T.M. did the behavioral experiments. M.L.D and F.S. analyzed the  
505 data. M.L.D and S.A.S wrote the manuscript.

506

507 **Data and Code Availability Statement**

508 The datasets generated during and/or analysed during the current study are available from the  
509 corresponding author on reasonable request. All scripts for analyzing data are also available by  
510 request.

511

512 **Declaration of Interests**

513 The authors declare no competing interests.

514

515 **References Cited**

- 516 1. Berry, R. J. & Bronson, F. H. Life History AND BIOECONOMY OF THE House Mouse.  
517 *Biol. Rev.* **67**, 519–550 (1992).
- 518 2. Meltzer, H. Y., Thompson, P. a., Lee, M. a. & Ranjan, R. Neuropsychologic deficits in  
519 schizophrenia: Relation to social function and effect of antipsychotic drug treatment.  
520 *Neuropsychopharmacology* **14**, 27S-33S (1996).
- 521 3. Steinvorth, S., Levine, B. & Corkin, S. Medial temporal lobe structures are needed to re-  
522 experience remote autobiographical memories : evidence from H . M . and W . R . **43**,  
523 479–496 (2005).
- 524 4. Silva, A., Kogan, J. H., Frankland, P. W. & Silva, A. J. Kogan , J . H . , Frankland , P . W .  
525 & Silva , A . J . Long- term memory underlying hippocampus- dependent social  
526 recognition in mice . Long-Term Memory Underlying Hippocampus-Dependent Social  
527 Recognition in Mice. **1063**, 47–56 (2015).
- 528 5. Squire, L. R. & Wixted, J. T. The Cognitive Neuroscience of Human Memory Since H . M .  
529 . *Annu Rev Neurosci* 259–290 (2011). doi:10.1146/annurev-neuro-061010-113720
- 530 6. O'Keefe, J. & Dostrovsky, J. The hippocampus as a spatial map. Preliminary evidence  
531 from unit activity in the freely-moving rat. *Brain Res.* **34**, 171–175 (1971).
- 532 7. MacDonald, C. J., Lepage, K. Q., Eden, U. T. & Eichenbaum, H. Hippocampal 'time cells'  
533 bridge the gap in memory for discontinuous events. *Neuron* **71**, 737–749 (2011).
- 534 8. Kraus, B., Robinson, R., White, J., Eichenbaum, H. & Hasselmo, M. Hippocampal 'Time  
535 Cells': Time versus Path Integration. *Neuron* **78**, 1090–1101 (2013).
- 536 9. McKenzie, S. *et al.* Hippocampal Representation of Related and Opposing Memories  
537 Develop within Distinct, Hierarchically Organized Neural Schemas. *Neuron* **83**, 202–215  
538 (2014).
- 539 10. Meira, T. *et al.* A hippocampal circuit linking dorsal CA2 to ventral CA1 critical for social  
540 memory dynamics. *Nat. Commun.* **9**, 1–14 (2018).

- 541 11. Hitti, F. L. & Siegelbaum, S. a. The hippocampal CA2 region is essential for social  
542 memory. *Nature* **508**, 88–92 (2014).
- 543 12. Stevenson, E. L. & Caldwell, H. K. Lesions to the CA2 region of the hippocampus impair  
544 social memory in mice. **40**, 3294–3301 (2014).
- 545 13. Okuyama, T., Kitamura, T., Roy, D. S., Itohara, S. & Tonegawa, S. social memory. **353**,  
546 (2016).
- 547 14. Rao, R. P., von Heimendahl, M., Bahr, V. & Brecht, M. Neuronal Responses to  
548 Conspecifics in the Ventral CA1. *Cell Rep.* **27**, 3460-3472.e3 (2019).
- 549 15. Mankin, E. a., Diehl, G. W., Sparks, F. T., Leutgeb, S. & Leutgeb, J. K. Hippocampal CA2  
550 Activity Patterns Change over Time to a Larger Extent than between Spatial Contexts.  
551 *Neuron* **85**, 190–202 (2015).
- 552 16. Alexander, G. M. *et al.* Social and novel contexts modify hippocampal CA2  
553 representations of space. *Nat. Commun.* **7**, 10300 (2016).
- 554 17. Oliva, A., Fern, A. & Ber, A. Spatial Coding and Physiological Properties of Hippocampal  
555 Neurons in the Cornu Ammonis Subregions. **1607**, 1593–1607 (2016).
- 556 18. Lu, L. *et al.* Topography of Place Maps along the CA3-to-CA2 Axis of the Hippocampus  
557 Article Topography of Place Maps along the CA3-to-CA2 Axis of the Hippocampus.  
558 1078–1092 (2015). doi:10.1016/j.neuron.2015.07.007
- 559 19. Wintzer, M. E., Boehringer, R., Polygalov, D. & McHugh, T. J. The hippocampal CA2  
560 ensemble is sensitive to contextual change. *J. Neurosci.* **34**, 3056–66 (2014).
- 561 20. Benes, F. M., Kwok, E. W., Vincent, S. L. & Todtenkopf, M. S. A reduction of  
562 nonpyramidal cells in sector CA2 of schizophrenics and manic depressives. *Biol.*  
563 *Psychiatry* **44**, 88–97 (1998).
- 564 21. Zhang, Z. J. & Reynolds, G. P. A selective decrease in the relative density of  
565 parvalbumin- immunoreactive neurons in the hippocampus in schizophrenia. **55**, 1–10  
566 (2002).

- 567 22. Piskorowski, R. A. *et al.* Age-Dependent Specific Changes in Area CA2 of the  
568 Hippocampus and Social Memory Deficit in a Mouse Model of the 22q11.2 Deletion  
569 Syndrome. *Neuron* **89**, 163–176 (2016).
- 570 23. Karayiorgou, M., Simon, T. J. & Gogos, J. a. 22q11.2 microdeletions: linking DNA  
571 structural variation to brain dysfunction and schizophrenia. *Nat. Rev. Neurosci.* **11**, 402–  
572 416 (2010).
- 573 24. Oliva, A., Fernández-Ruiz, A., Buzsáki, G. & Berényi, A. Spatial coding and physiological  
574 properties of hippocampal neurons in the Cornu Ammonis subregions. *Hippocampus* **26**,  
575 1593–1607 (2016).
- 576 25. Stefanini, F., Kheirbek, M. A., Kushnir, L. & Jessica, C. A distributed neural code in the  
577 dentate gyrus and in. 1–22 (2018).
- 578 26. Keinath, A. T. *et al.* Precise spatial coding is preserved along the longitudinal  
579 hippocampal axis. *Hippocampus* **24**, 1533–1548 (2014).
- 580 27. Saitta, L. Support-Vector Networks. **297**, 273–297 (1995).
- 581 28. Barak, O., Rigotti, M. & Fusi, S. The Sparseness of Mixed Selectivity Neurons Controls  
582 the Generalization–Discrimination Trade-Off. *J. Neurosci.* **33**, 3844–3856 (2013).
- 583 29. Rigotti, M. *et al.* The importance of mixed selectivity in complex cognitive tasks. *Nature*  
584 **497**, 585–90 (2013).
- 585 30. Rao, R. P. *et al.* Neuronal Responses to Conspecifics in the Ventral CA1. *CellReports* **27**,  
586 3460-3472.e3 (2019).
- 587 31. Meira, T. *et al.* CA1 critical for social memory dynamics. *Nat. Commun.* 1–14  
588 doi:10.1038/s41467-018-06501-w
- 589 32. Borsotto, M. *et al.* Targeting two-pore domain K<sup>+</sup> channels TREK-1 and TASK-3 for the  
590 treatment of depression: A new therapeutic concept. *Br. J. Pharmacol.* **172**, 771–784  
591 (2015).
- 592 33. Giocomo, L. M. *et al.* Grid Cells Use HCN1 Channels for Spatial Scaling. *Cell* **147**, 1159–

- 593 1170 (2011).
- 594 34. Voloshyna, I. *et al.* TREK-1 Is a Novel Molecular Target in Prostate Cancer. 1197–1204  
595 (2008). doi:10.1158/0008-5472.CAN-07-5163
- 596 35. Pasquale, G. Di *et al.* Identification of PDGFR as a receptor for AAV-5 transduction. **9**,  
597 1306–1312 (2003).
- 598 36. Stark, K. L. *et al.* Altered brain microRNA biogenesis contributes to phenotypic deficits in  
599 a 22q11-deletion mouse model. *Nat. Genet.* **40**, 751–760 (2008).
- 600 37. Talley, E. M., Solo, G., Lei, Q., Kim, D. & Bayliss, D. A. CNS Distribution of Members of  
601 the Two-Pore-Domain ( KCNK ) Potassium Channel Family. **21**, 7491–7505 (2001).
- 602 38. Xu, B., Hsu, P.-K., Stark, K. L., Karayiorgou, M. & Gogos, J. a. Derepression of a  
603 neuronal inhibitor due to miRNA dysregulation in a schizophrenia-related microdeletion.  
604 *Cell* **152**, 262–75 (2013).
- 605 39. Noël, J., Sandoz, G. & Lesage, F. Molecular regulations governing TREK and TRAAK  
606 channel functions. *Channels* **5**, (2011).
- 607 40. Middleton, S. J. & McHugh, T. J. Silencing CA3 disrupts temporal coding in the CA1  
608 ensemble. *Nat. Neurosci.* 1–10 (2016). doi:10.1038/nn.4311
- 609 41. Talbot, Z. N. *et al.* Normal CA1 Place Fields but Discoordinated Article Normal CA1 Place  
610 Fields but Discoordinated Network Discharge in a Fmr1 -Null Mouse Model of Fragile X  
611 Syndrome. 684–697 (2018). doi:10.1016/j.neuron.2017.12.043
- 612 42. Zaremba, J. D. *et al.* Impaired hippocampal place cell dynamics in a mouse model of the  
613 22q11.2 deletion. *Nat. Neurosci.* **20**, 1612 (2017).
- 614 43. Raam, T., Mcavoy, K. M., Besnard, A., Veenema, A. H. & Sahay, A. discrimination of  
615 social stimuli. *Nat. Commun.* **2017**, 1–14
- 616 44. Young, W. S., Li, J., Wersinger, S. R. & Palkovits, M. The vasopressin 1b receptor is  
617 prominent in the hippocampal area CA2 where it is unaffected by restraint stress or  
618 adrenalectomy. *Neuroscience* **143**, 1031–1039 (2006).

- 619 45. Smith, A. S., Williams Avram, S. K., Cymerblit-Sabba, A., Song, J. & Young, W. S.  
620 Targeted activation of the hippocampal CA2 area strongly enhances social memory. *Mol.*  
621 *Psychiatry* 1–8 (2016). doi:10.1038/mp.2015.189
- 622 46. Cui, Z., Gerfen, C. R. & Young, W. S. Hypothalamic and other connections with dorsal  
623 CA2 area of the mouse hippocampus. *J. Comp. Neurol.* **521**, 1844–1866 (2013).
- 624 47. Stefanini, F., Kheirbek, M. A. & Kushnir, L. A distributed neural code in the dentate gyrus  
625 and in. 1–22 (2018).
- 626
- 627
- 628
- 629

630 **Methods**

631 We bred *Df(16)A<sup>+/-</sup>* mice and their wild-type littermates on a pure (>99.9%) C57BL/6J  
632 background (The Jackson Laboratory) as previously described<sup>23</sup>. Experiments were carried out  
633 on adult male mice (22-28 g, 3-6 months old). Mice were housed 3-5 in a cage under a 12:12 h  
634 light/dark cycle with access to food and water *ad libitum*. Experiments were conducted during  
635 the light cycle. All procedures were approved by the Animal Care and Use Committee of  
636 Columbia University and were in accordance with the National Institutes of Health guidelines for  
637 care and use of animals.

638

639 *Surgical Procedures*

640 19 mice (10 *Df(16)A<sup>+/-</sup>* mice, 3 wild-type littermates, 6 wild-type C57Bl/6J non-littermates), were  
641 implanted with electrode bundles containing 7-8 tetrodes in a moveable drive using sterile  
642 surgical techniques. Wild-type littermates and wild-type non-littermates were not significantly  
643 different in any of the physiological measures discussed with the exception of spatial stability, in  
644 which littermates were significantly less stable than non-littermate wild-type mice; both control  
645 groups were significantly less stable than both CA1 and *Df(16)A<sup>+/-</sup>* CA2 recordings  
646 (Supplemental Figure 8). Animals were anesthetized with 2-5% isoflourane and placed in a  
647 stereotaxic frame. Craniotomies were made above CA2 (1.8 mm posterior to bregma, 2.15 mm  
648 lateral to the midline, ~1.5 mm below the brain surface) or CA1 (1.9 mm posterior to bregma,  
649 1.8 mm lateral to the midline, ~1 mm below the brain surface). To prevent damage to the  
650 recording site, tetrodes were implanted above the structure and turned down 50-150  $\mu\text{m}$  per day  
651 after recovery from surgery. A skull screw was placed over the contralateral visual cortex to  
652 serve as ground. To verify recording locations, 50  $\mu\text{A}$  of current was passed through the  
653 channels at the end of the experiment to create an electrolytic lesion (Supplemental Figure  
654 9). For viral injections, 200  $\mu\text{l}$  of either AAV2.5-hsyn-mCherry or AAV2.5.-hsyn-TREK-1DN-



655 GFP were injected bilaterally into CA2 (1.8 mm posterior to bregma, 1.8 mm lateral to the  
656 midline, 1.2 mm below the brain surface). After experiments animals were perfused, and brains  
657 were cut on a vibrotome and stained for RGS-14 and NeuN. One animal was excluded from the  
658 TREK-1 DN group because there was only unilateral expression of the virus..

659

#### 660 *Recording and Spike Sorting*

661 Recordings were amplified, band-pass filtered (1–1,000 Hz LFPs, 300–6,000 Hz spikes), and  
662 digitized using the Neuralynx Digital Lynx system or the OpenEphys GUI. LFPs were collected  
663 at a rate of 2 kHz, while spikes were detected by online thresholding and collected at 30 kHz.  
664 Units were initially clustered using Klustakwik, sorted according to the first two principal  
665 components, voltage peak and energy from each channel. Clusters were then accepted,  
666 merged or eliminated based on visual inspection of feature segregation, waveform  
667 distinctiveness and uniformity, stability across recording session, and inter-spike interval  
668 distribution.

669

#### 670 *Behavior: Three-chamber Interaction Task*

671 Mice were given 1 week to recover from surgery, after which tetrodes were turned down to  
672 stratum pyramidale of the hippocampus. After tetrodes reached the hippocampus and were  
673 stable for at least 48 hours (Supplemental Figure 9), animals were habituated to the three-  
674 chamber arena (60 x 40 cm) for 40-50 minutes. Barriers were placed in the environment every  
675 10 minutes to briefly isolate mice in the center chamber to match the protocol of the three-  
676 chamber task (Figure 1d). The following day animals were run in the three-chamber social  
677 interaction task shown in Figure 1a. The subject mouse was isolated in the central chamber  
678 between each of the five sessions by placement of barriers. Side chambers were quickly wiped  
679 with 70% alcohol between each session to rid the side chambers of any olfactory cues from the  
680 previous session. The trajectory of the animal was recorded in Neuralynx using LEDs on the

681 head to track the position of the head or using custom MATLAB software for tracking webcam  
682 images. Trajectory and behavior were analyzed using custom scripts in MATLAB. Interaction  
683 zones were defined as a 7 cm annulus from the edges of each respective cup. Experimenters  
684 were blind to experimental condition during recordings.

685

#### 686 *Behavior: Direct Interaction Task*

687 The direct interaction task was performed on 9 wild-type mice and 9 *Df(16)A<sup>+/-</sup>* mice injected with  
688 saline control and with 16 wild-type and 13 *Df(16)A<sup>+/-</sup>* mice injected with spadin. Subject mice  
689 were habituated to the cage for 30 min. A novel juvenile male mouse was placed into the cage  
690 for 2 min (Trial 1), during which the subject mouse was allowed to explore the juvenile. Mice  
691 that interacted for less than 24 seconds in Trial 1 were excluded from analysis (1 wild-type  
692 mouse was excluded from the saline group; 1 wild-type and 3 *Df(16)A<sup>+/-</sup>* mice were excluded  
693 from the spadin group). The juvenile mouse was removed for 30 minutes and then placed back  
694 into the cage with the subject for an additional 2 minutes (Trial 2). For the novel-novel version  
695 of the direct interaction task (Supplemental Figure 7), a second novel juvenile mouse was  
696 placed in the cage in Trial 2. Behavioral videos were recorded and analyzed in Anymaze 2.0;  
697 social interactions were defined as periods of facial or anogenital sniffing, grooming of the  
698 juvenile mouse, and periods of chasing the juvenile. Researchers were blind to experimental  
699 condition during both the behavioral experiments and the analysis.

700

#### 701 *Spatial Fields*

702 Spatial analyses were performed with custom written scripts in MATLAB. From each session,  
703 X,Y positions from LEDs placed on the animals head during the three-chamber were projected  
704 onto the apparatus axis. The position and spiking data were binned into 5-cm wide segments,  
705 generating the raw maps of spike number and occupancy probability, with unvisited bins for  
706 each session represented as NaNs. Rate map, number of place fields, field sizes, spatial

707 information, and selectivity were calculated. A Gaussian kernel (SD = 5.5 cm) was applied to  
708 both raw maps of spike and occupancy, and a smoothed rate map was constructed by dividing  
709 the smoothed spike map by the smoothed occupancy map. A place field was defined as a  
710 continuous region, of at least 9 cm, where the firing rate was above 10% of the peak rate in the  
711 maze, with a peak firing rate >2 Hz. Spatial stability was calculated as the Pearson's correlation  
712 ( $r$ ) of the firing rate in each binned location for each session only using those spatial bins that  
713 were visited in all sessions being compared.

714

### 715 *Statistics and Normalization*

716 All effects presented as statistically significant exceeded an  $\alpha$ -threshold of 0.05. All  
717 independence tests were two-tailed. All independence testing of paired values (that is, changes  
718 across conditions) used paired t-tests or (where stated) signed rank tests. All t-tests and rank  
719 tests performed with more than two groups were done post-hoc following ANOVA tests or  
720 Kruskal Wallis tests, except where Bonferroni correction for multiple comparisons is specifically  
721 cited. Normalization refers to z-scored data. For all box plots displayed the center line is the  
722 mean; box limits are upper and lower quartiles; whiskers and min to max values in data sets.

723

### 724 *Position Decoder*

725 For decoding position<sup>47</sup>, we considered the different sessions of the tasks separately to evaluate  
726 the different valences. For all the datasets, unless otherwise specified, we used 10-fold cross  
727 validation to validate the performance of the decoders. We divided each individual 10 min trial  
728 into 10 temporally contiguous periods of equal size in terms of number of data points (spikes).  
729 We then trained the decoders using the data from 9 of the 10 periods and tested the  
730 performance of the decoder on the remaining data in the session.

731 To decode the position of the animal, we first divided the arena into 12 x 8 equally sized,  
732 square bins. We then labeled each time point with the discrete location in which the animal was

733 found. For each pair of locations, we trained a Support Vector Machine (SVM) classifier with a  
734 linear kernel to classify the cell activities into either of the two assigned locations using all the  
735 identified cells unless specified otherwise. We used only the data corresponding to the two  
736 assigned locations; to correct for unbalanced data due to inhomogeneous exploration of the  
737 arena we balanced the classes with weights inversely proportional to the class frequencies<sup>48</sup>.  
738 The output of the classifiers was then combined to identify the location with the largest number  
739 of votes as the most likely location. The decoding error reported corresponds to the median  
740 physical distance between the center of this location and the actual position of the mouse in  
741 each time bin of the test set, unless otherwise specified. For datasets with different numbers of  
742 cells we randomly down sampled until all groups had equal numbers of cells.

743 To assess the statistical significance of the decoder, we computed chance distributions  
744 of decoding error using shuffled distributions of spike events. Briefly, for each shuffling, we  
745 assigned a random time bin to each spike event for each cell independently while maintaining  
746 the overall density of spike events across all cells. That is, we chose only time bins in which  
747 there were spike events in the original data and kept the same number and magnitude of the  
748 events in each time bin. This method destroys spatial information as well as temporal  
749 correlations but keeps the overall activity across cells. We trained one decoder on each shuffled  
750 distribution and pooled all the errors obtained. We finally assessed the statistical significance of  
751 the decoding error for the 5-fold cross-validation of the original data by comparing them to the  
752 distribution of errors obtained from the shuffled data using the non-parametric Mann-Whitney U  
753 test, from which we obtained a p-value of significance.

754

#### 755 *Session/Social Information Decoder*

756 All sessions were divided into 5 equal time bins, and a Support Vector Machine (SVM) was  
757 trained to decode either which session the animal was engaged or with which animal the subject  
758 mouse was interacting with, using 4 time bins to train and the remaining time bin to test. In the

759 case of unequal interaction times, training sets were subsampled to the length of the shorter  
760 interactions. Chance was determined by training and testing the decoder on shuffled data.  
761 Statistical significance was assessed by comparing to the distribution of the shuffled data using  
762 the Mann-Whitney U test.

763

#### 764 *Spadin administration*

765 For the three-chamber experiments described, 0.1 ml of  $10^{-5}$  M spadin (Tocris) or saline was  
766 administered intraperitoneally 30 minutes before the three-chamber interaction task in 5 of the  
767 *Df(16)A<sup>+/-</sup>* mice. CA2 firing properties in *Df(16)A<sup>+/-</sup>* mice treated with saline did not show any  
768 significant differences from the untreated *Df(16)A<sup>+/-</sup>* mice (Supplemental Figure 7). For the direct  
769 interaction task described, either 0.1 ml of saline or 0.1 ml of  $10^{-5}$  M spadin was injected into  
770 *Df(16)A<sup>+/-</sup>* mice and wild-type littermate controls 30 minutes before trial 1 of the direct  
771 interaction.

772

#### 773 *TREK-1 Dominant Negative Virus Generation*

774 From<sup>34</sup>: A dnTREK-1 mutant was created from the mTREK-1 plasmid by the introduction of two point  
775 mutations in the selectivity filter of the pore region (G161E and G268E). The mutations were  
776 introduced using the QuikChange kit (Stratagene). The primers designed to generate the mutation of  
777 G161 to E were 5'-CCATAGGATTTGAGAACATCTCACCACGC-3' (forward) and 5'-  
778 GGGTGGTGAGATGTTCTCAAATCCTATGG-3' (reverse), and 5'-  
779 CTCTAACAACTATTGAATTTGGTGACTACGTTGC-3' (forward) and 5'-  
780 GCAACGTAGTCACCAAATTCAATAGTTGTTAGAG-3' (reverse) for G268 to E. This mutant channel  
781 expresses well but carries no current when expressed in CHO cells.

782
